# Supplementary material
Source: Springer Nature journal article supplement (https://www.springermedizin.de/resource/supplementary/12913_2008_876_MOESM3_ESM.pdf/9536452)

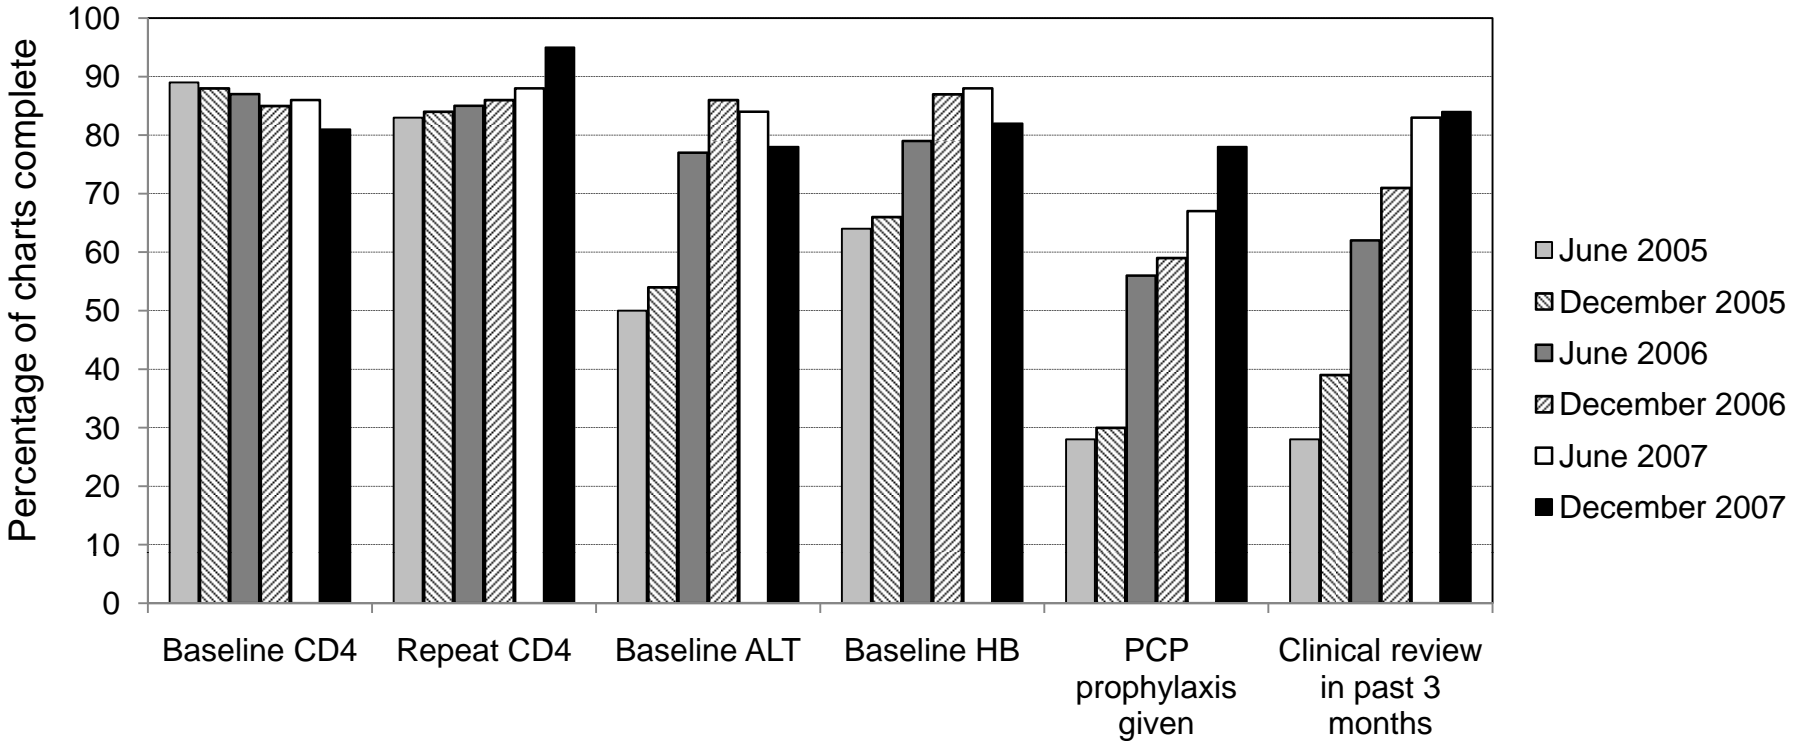

Supplement: MOESM3 [file 9536452]
